# Supplementary material for: Ginger nanoparticles mediated induction of Foxa2 prevents high-fat diet-induced insulin resistance
Source: PubMed Central journal article supplement (PMC8771553; doi:10.7150/thno.62514), 2022-01-01
Supplement: thnov12p1388s1.pdf [file thnov12p1388s1.pdf]

# Supplementary information

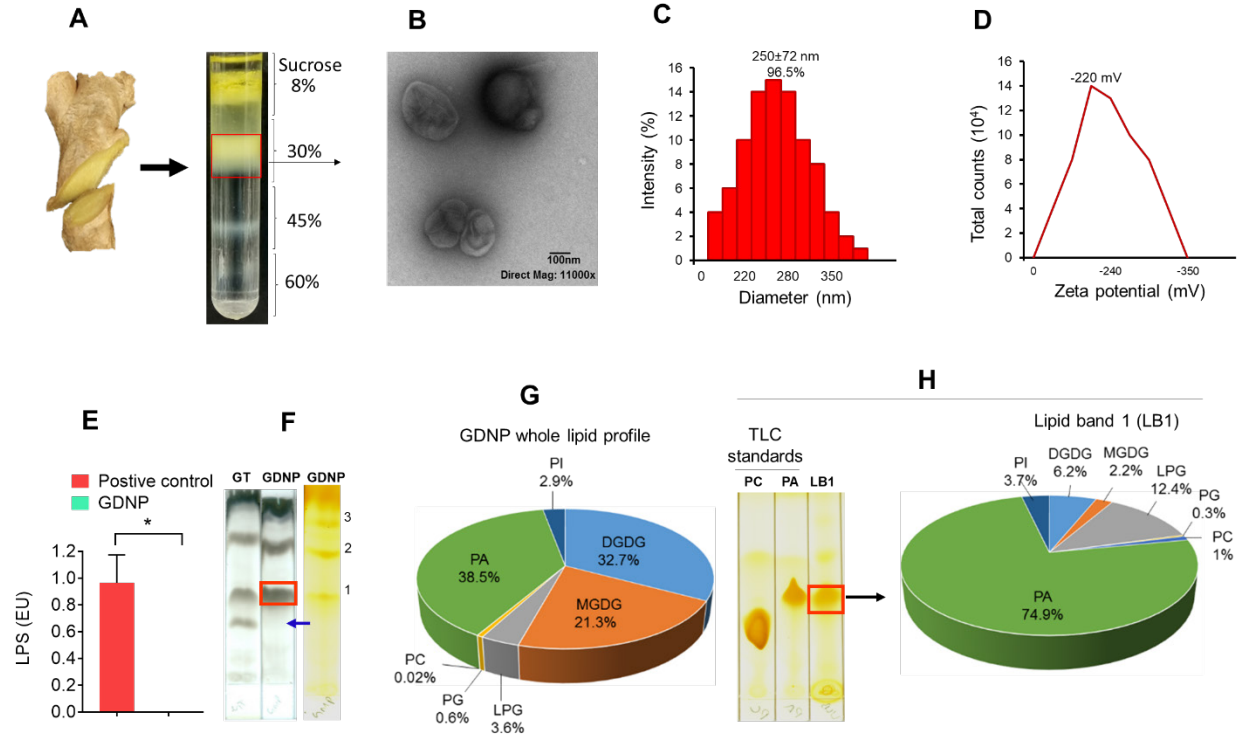

### **Figure S1: Characterization of ginger nanoparticles (GDNP).**

- A.** Depiction of the sucrose gradient purification of ginger-derived nanoparticles (GDNP).
- B.** Electron micrograph of purified GDNP from the red box in panel A.
- C.** GDNP size distribution as determined using the Zeta sizer.
- D.** Zeta potential of GDNP as determined using the Zeta sizer.
- E.** LPS detection in GDNP. Student *t* (one-tailed) test. *p* value  $* < 0.05$ .
- F.** Thin layer chromatography (TLC) profile of lipids derived from whole ginger root (GT) and ginger nanoparticles (GDNP) stained with CuSO<sub>4</sub> or iodine fumes. The red box shows lipid band 1, which is responsible for induction of Foxa2. The blue arrow indicates the absent of the lipid band in GDNP.
- G.** Pie chart representing the lipid composition of GDNP analyzed by quadrupole mass spectrometry (Q-MS).
- H.** TLC lipid profile of lipid band 1 (LB1). PA and PC were used as standards in the TLC analysis.
- I.** GDNP dose per day in drinking water.

Student *t* test (one tailed) was used to calculate statistical significance. (*p* value  $* < 0.05$ ).

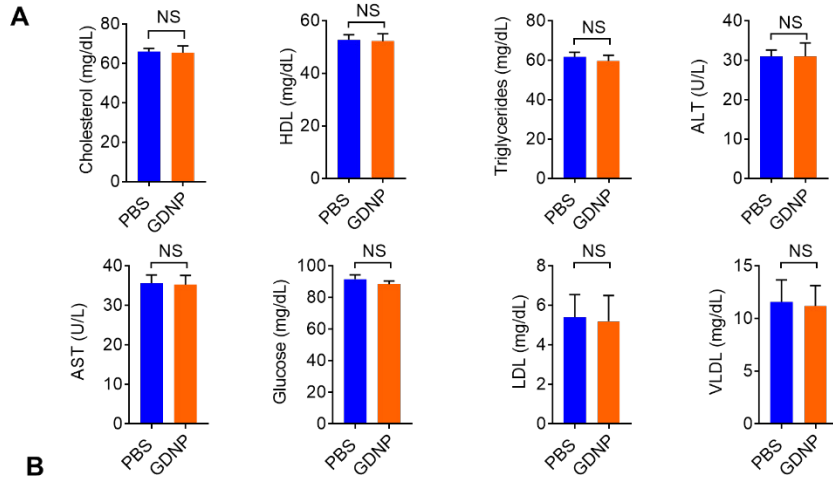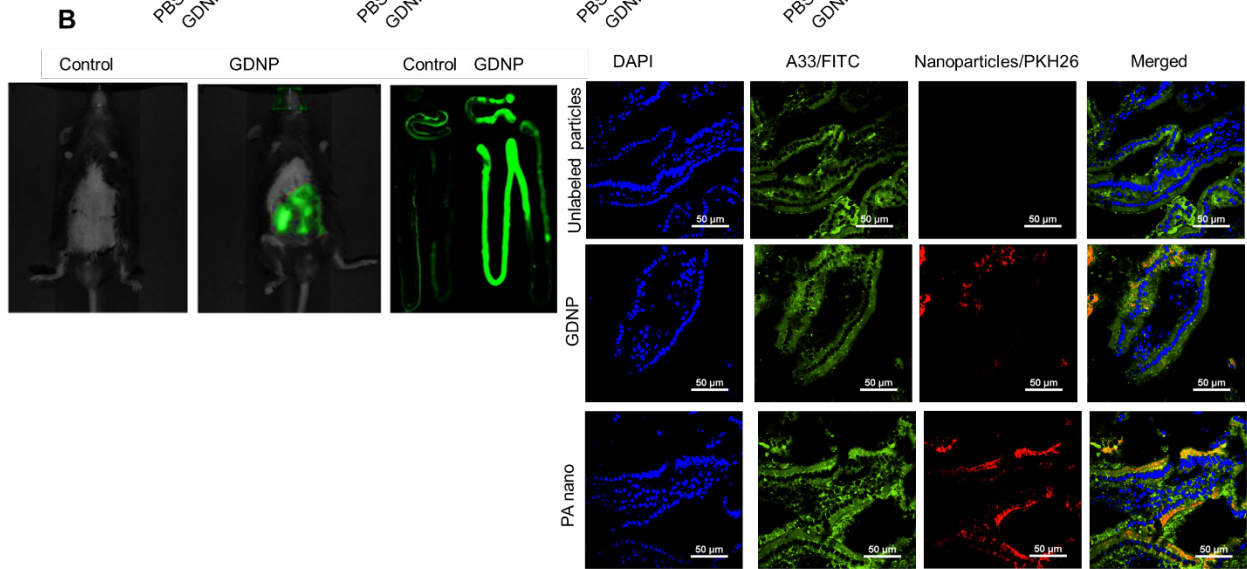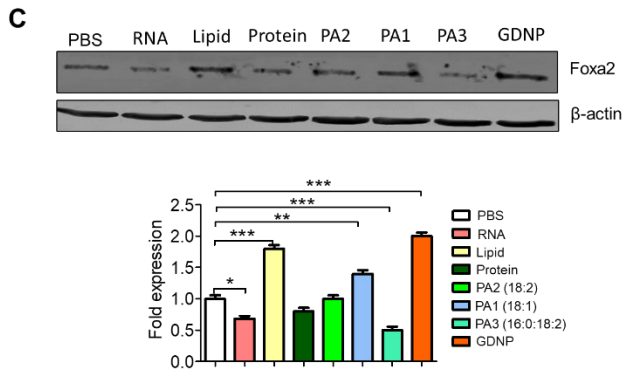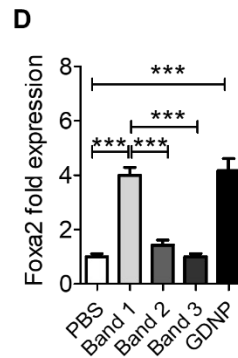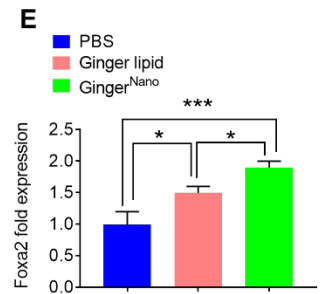

## **Figure S2: Gut epithelial cell uptake of GDNP.**

- A.** Lipid profile of plasma derived from lean mice treated with PBS or GDNP after 2 weeks (n = 5 per group).
- B.** Live imaging of mouse gavaged the DIR labeled GDNP after 6 hours (GDNP panel). Small and large intestine showing the GDNP or PA nanoparticle uptake and A33 positive cells uptake of PKH26 labeled GDNP/PA nanoparticles. Control represented as unlabeled GDNP.
- C.** Foxa2 protein expression in MC-38 cells following treatment with PBS, GDNP RNA, protein extracts with phosphatidic acids (PAs) lipids or GDNP.
- D.** Foxa2 mRNA expression following treatment with either PBS, each band of GDNP lipids, or complete GDNP.
- E.** QRT PCR for Foxa2 mRNA expression in MC-38 cells treated with ginger lipid (linear form) and nanoparticles.

One-way ANOVA with a Bonferroni correction for multiple comparisons was used to calculate statistical significance. ( $p$  value \* $<0.05$ ; \*\* $<0.01$ ; \*\*\* $<0.001$ ).

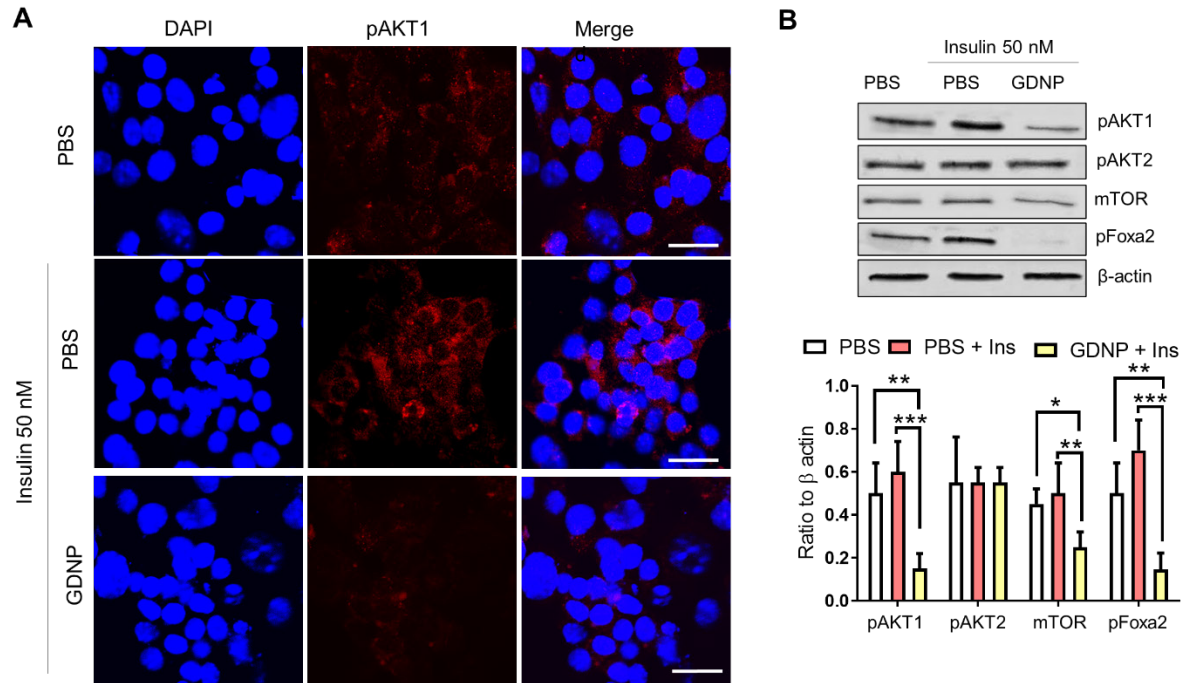

**Figure S3: GDNP treatment inhibits the pAKT-1-mediated phosphorylation of Foxa2.**

**A.** Confocal images showing expression of pAKT1 (red) in MC-38 cells cultured with 50 nM insulin and PBS or GDNP. Scale bar is 20  $\mu$ M.

**B.** Western blots of pAKT1, pAKT2 mTOR and pFoxa2 expression in MC-38 cells cultured with 50 nM insulin and treated with PBS or GDNP.

One-way ANOVA with a Bonferroni correction for multiple comparisons was used to calculate statistical significance. ( $p$  value \* $<0.05$ ; \*\* $<0.01$ ; \*\*\* $<0.001$ ).

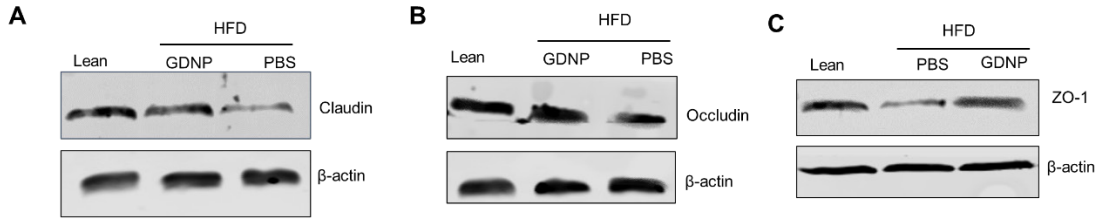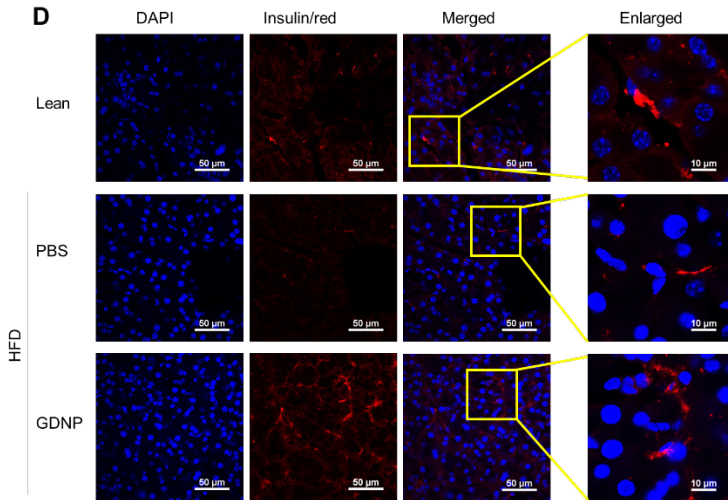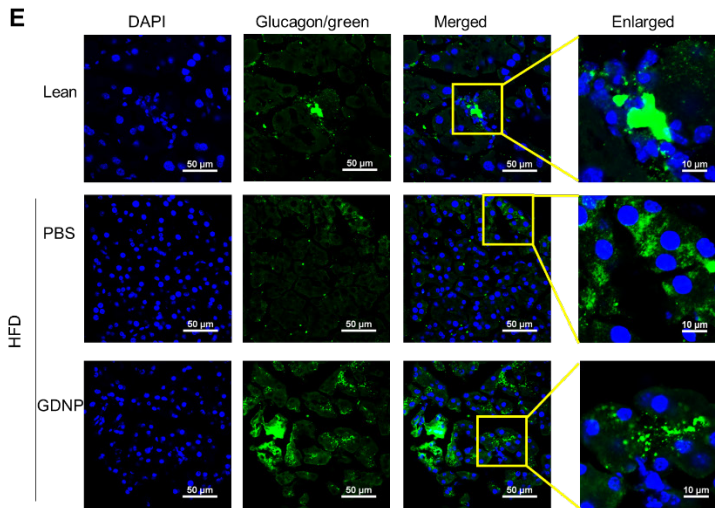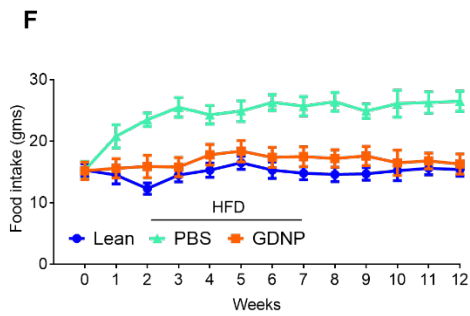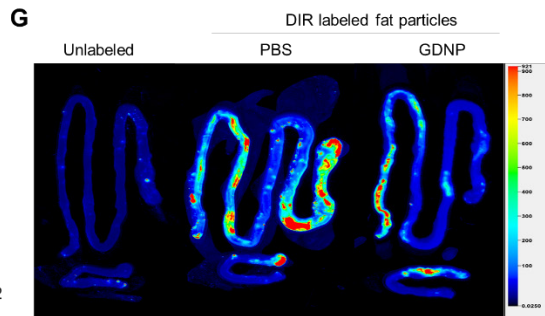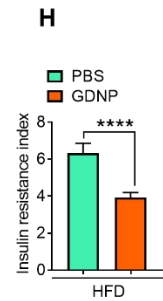

**Figure S4: GDNP enhances the gut barrier integrity in HFD mice.**

- A. – C.** Western blots for tight junction proteins Claudin (A), Occludin (B) and ZO-1 (C) for small intestinal tissue.
- D.** Confocal images depicting the expression of insulin in pancreatic tissues derived from lean and HFD mice treated with PBS or GDNP in fed condition (n = 5 per group).
- E.** Confocal images depicting the expression of glucagon in pancreatic tissues derived from lean and HFD-fed mice treated with PBS or GDNP in fed condition (n = 5 per group).
- F.** Food intake for lean and HFD-fed mice treated with PBS and GDNP.
- G.** Images from small and large intestine for DIR labeled fat particles uptake.
- H.** Insulin resistance index for HFD-fed mice treated with PBS or GDNP.

Student *t* test (one tailed) was used to calculate statistical significance. (*p* value \*\*\*\*<0.0001).

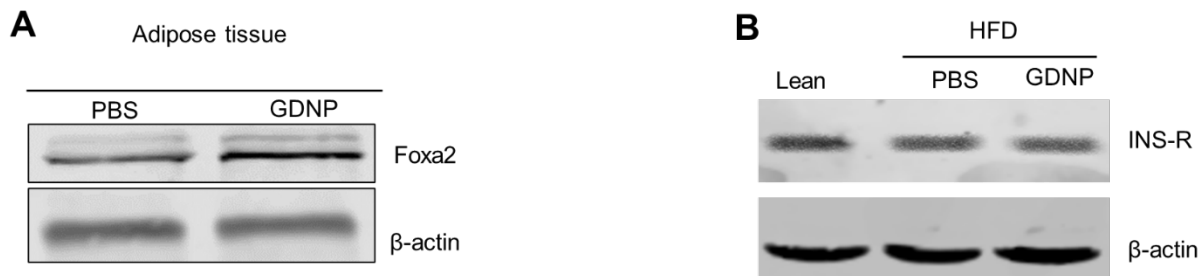

**Figure S5: Western blots for Foxa2 (A) and Insulin receptor (B) in adipose tissues.**

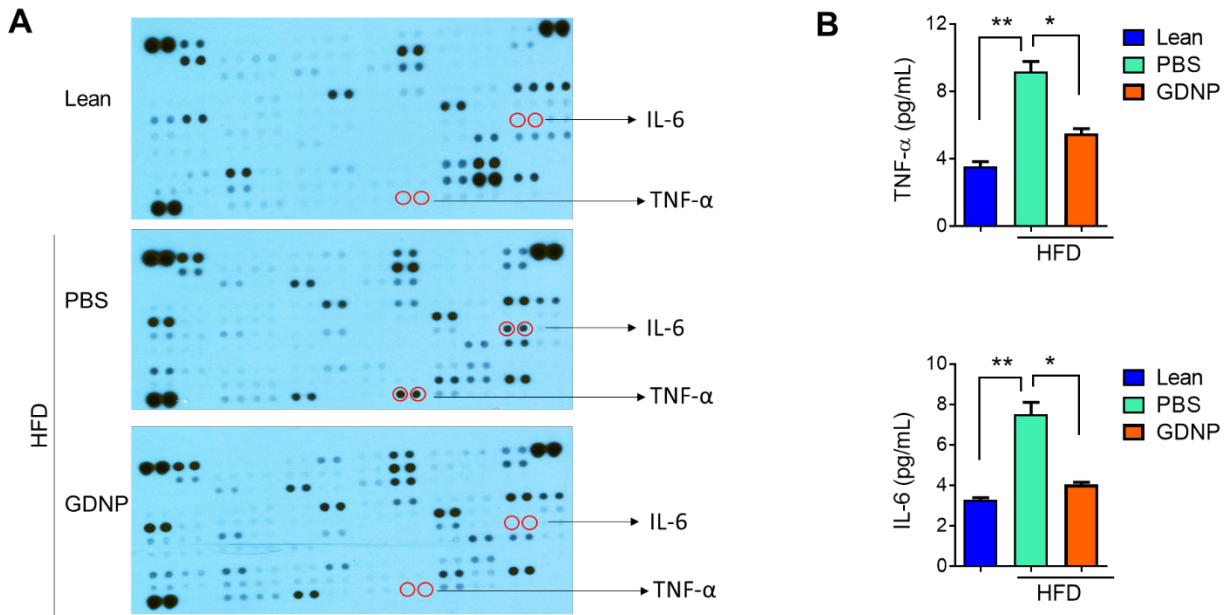

**Figure S6: GDNP treatment prevent the mice from chronic inflammation**

- A.** Cytokine array of adipose tissue lysates derived from lean and HFD-fed mice treated with PBS or GDNP (n = 5 per group).
- B.** Levels of inflammatory cytokines TNF- $\alpha$  and IL-6 in liver tissue lysates determined by ELISA (n = 5 per group).

One-way ANOVA with a Bonferroni correction for multiple comparisons was used to calculate statistical significance. ( $p$  value  $^* < 0.05$ ;  $^{**} < 0.01$ ).



**A**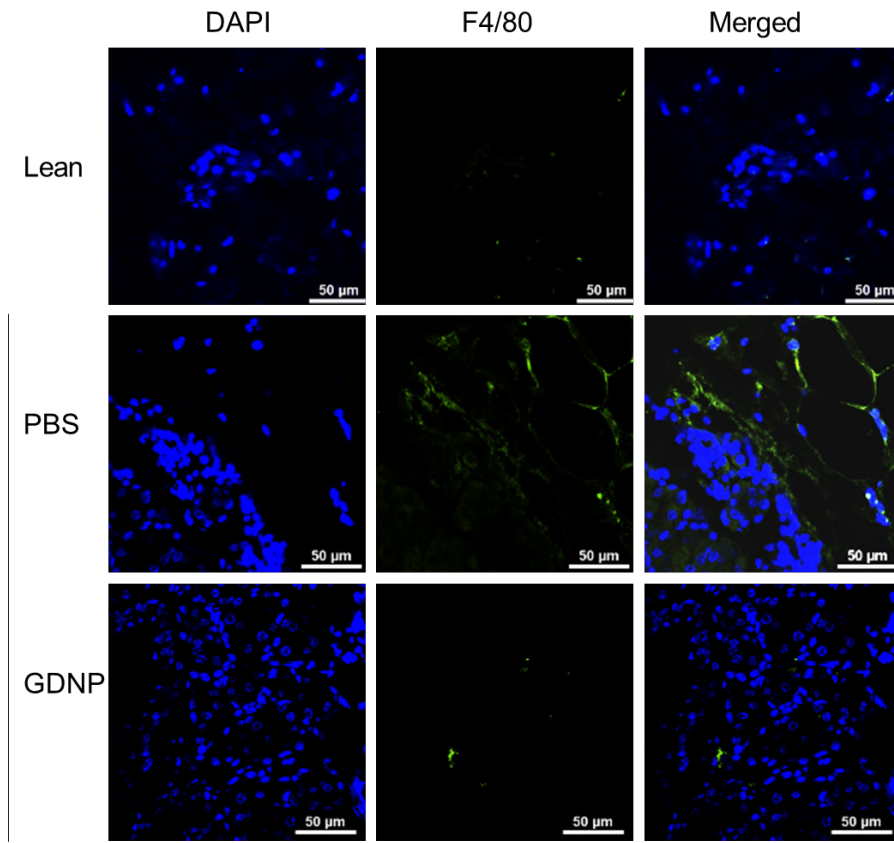**B**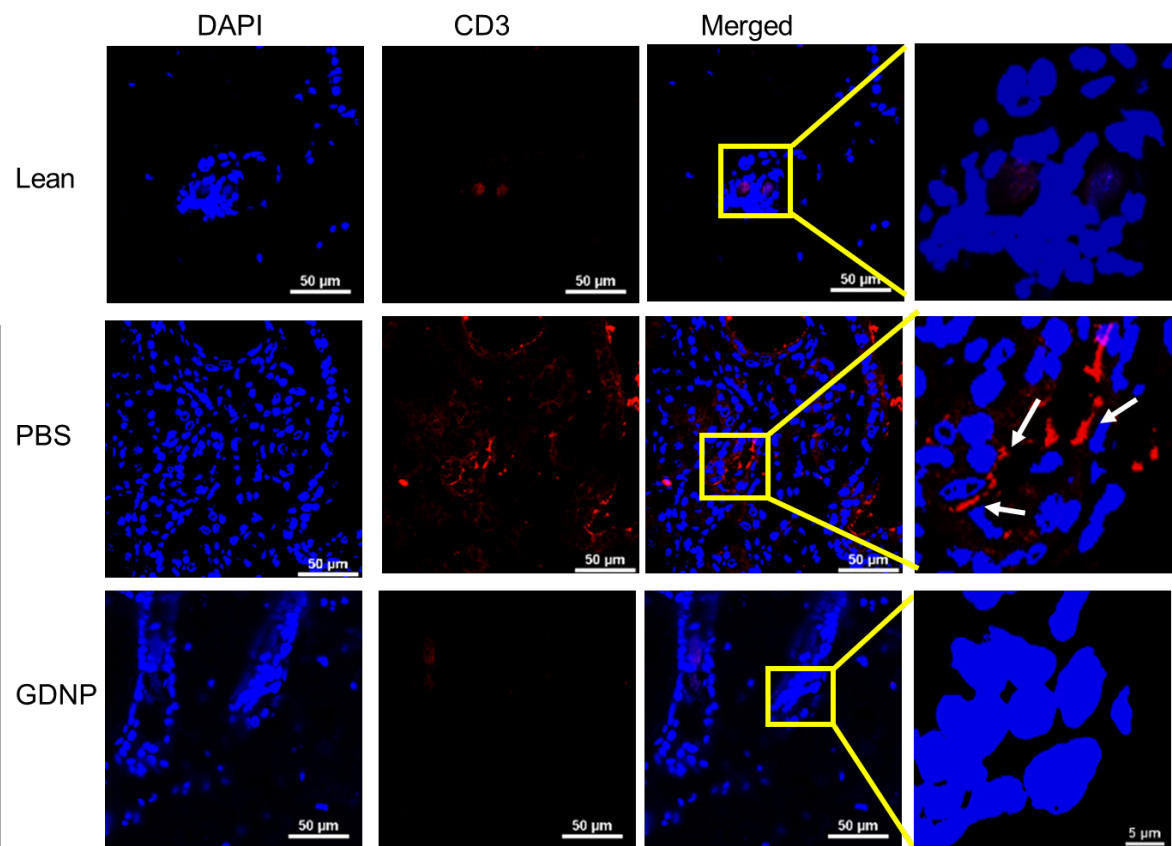

**Figure S7: GDNP inhibit the immune cells infiltration caused by long-term HFD in skin tissues.**

**A. –B.** Visualization of macrophage (F4/80<sup>+</sup>; a) and T cell (CD3<sup>+</sup>; b) infiltration (white arrow) in HFD-fed mouse skin tissues by confocal microscopy.

**Table S1:** Primers used in the study

| Target | Sequence (5' – 3')    | Tm   |
|--------|-----------------------|------|
| Foxa2F | CCCTACGCCAACATGAACTCG | 64.5 |
| Foxa2R | GTTCTGCCGGTAGAAAGGGA  | 62.4 |

**Table S2:** List of antibodies used in the study

| S. No. | Target  | Application | Source            | Cat. No.   |
|--------|---------|-------------|-------------------|------------|
| 1      | Foxa2   | IF/Western  | R&D Systems       | MAB2400    |
| 2      | pFoxa2  | IF/WB       | Thermo Scientific | 710680     |
| 3      | AHR     | WB          | Santa Cruz        | Sc133088   |
| 4      | A33     | IF/Flow     | Biorybt           | Orb15687   |
| 5      | pAkt-1  | IF/WB       | Cell Signaling    | 9018S      |
| 6      | pAkt-2  | IF/WB       | Cell Signaling    | 8599S      |
| 7      | B-Actin | WB          | Santa Cruz        | Sc47778    |
| 8      | GAPDH   | WB          | Santa Cruz        | Sc47724    |
| 9      | F4/80   | IF          | eBioscience       | 14-4801-82 |

**Table S3:** Quadrupole MS analysis of GDNP whole lipids and lipid band 1 (nm).

| Mass              | Compound Formula | Compound Name     | GDNP Whole lipid (nm) | Lipid band 1 (nm) |
|-------------------|------------------|-------------------|-----------------------|-------------------|
| 926.6             | C49H80O15        | DGDG(34:6)        | 0.00                  | 0.00              |
| 928.6             | C49H82O15        | DGDG(34:5)        | 0.00                  | 0.02              |
| 930.6             | C49H84O15        | DGDG(34:4)        | 0.00                  | 0.00              |
| 932.6             | C49H86O15        | DGDG(34:3)        | 0.42                  | 0.21              |
| 934.6             | C49H88O15        | DGDG(34:2)        | 2.86                  | 1.03              |
| 936.6             | C49H90O15        | DGDG(34:1)        | 5.13                  | 0.98              |
| 954.6             | C51H84O15        | DGDG(36:6)        | 0.51                  | 0.00              |
| 956.6             | C51H86O15        | DGDG(36:5)        | 2.01                  | 0.24              |
| 958.6             | C51H88O15        | DGDG(36:4)        | 9.61                  | 1.21              |
| 960.6             | C51H90O15        | DGDG(36:3)        | 6.69                  | 1.24              |
| 962.6             | C51H92O15        | DGDG(36:2)        | 3.56                  | 0.00              |
| 964.7             | C51H94O15        | DGDG(36:1)        | 1.88                  | 1.22              |
| 982.6             | C53H88O15        | DGDG(38:6)        | 0.00                  | 0.00              |
| 984.6             | C53H90O15        | DGDG(38:5)        | 0.00                  | 0.00              |
| 986.6             | C53H92O15        | DGDG(38:4)        | 0.00                  | 0.00              |
| 988.7             | C53H94O15        | DGDG(38:3)        | 0.00                  | 0.00              |
| <b>Total DGDG</b> |                  | <b>Total DGDG</b> | <b>32.66</b>          | <b>6.17</b>       |
| 764.5             | C43H70O10        | MGDG(34:6)        | 0.00                  | 0.17              |
| 766.5             | C43H72O10        | MGDG(34:5)        | 0.09                  | 0.00              |

|                     |            |                     |              |              |
|---------------------|------------|---------------------|--------------|--------------|
| 768.5               | C43H74O10  | MGDG(34:4)          | 0.03         | 0.05         |
| 770.5               | C43H76O10  | MGDG(34:3)          | 2.34         | 0.10         |
| 772.6               | C43H78O10  | MGDG(34:2)          | 0.18         | 0.00         |
| 774.6               | C43H80O10  | MGDG(34:1)          | 1.20         | 0.00         |
| 792.5               | C45H74O10  | MGDG(36:6)          | 1.98         | 0.05         |
| 794.5               | C45H76O10  | MGDG(36:5)          | 4.00         | 0.07         |
| 796.6               | C45H78O10  | MGDG(36:4)          | 7.33         | 0.75         |
| 798.6               | C45H80O10  | MGDG(36:3)          | 2.83         | 0.16         |
| 800.6               | C45H82O10  | MGDG(36:2)          | 0.94         | 0.00         |
| 802.6               | C45H84O10  | MGDG(36:1)          | 0.00         | 0.00         |
| 820.6               | C47H78O10  | MGDG(38:6)          | 0.00         | 0.12         |
| 822.6               | C47H80O10  | MGDG(38:5)          | 0.33         | 0.00         |
| 824.6               | C47H82O10  | MGDG(38:4)          | 0.00         | 0.00         |
| 826.6               | C47H84O10  | MGDG(38:3)          | 0.00         | 0.76         |
| <b>Total MGDG</b>   |            | <b>Total MGDG</b>   | <b>21.25</b> | <b>2.23</b>  |
| 738.5               | C38H73O10P | PG(32:1)            | 0.05         | 0.02         |
| 740.5               | C38H75O10P | PG(32:0)            | 0.04         | 0.13         |
| 760.5               | C40H71O10P | PG(34:4)            | 0.03         | 0.00         |
| 762.5               | C40H73O10P | PG(34:3)            | 0.06         | 0.00         |
| 764.5               | C40H75O10P | PG(34:2)            | 0.18         | 0.04         |
| 766.5               | C40H77O10P | PG(34:1)            | 0.02         | 0.07         |
| 768.5               | C40H79O10P | PG(34:0)            | 0.05         | 0.00         |
| 784.5               | C42H71O10P | PG(36:6)            | 0.01         | 0.00         |
| 786.5               | C42H73O10P | PG(36:5)            | 0.02         | 0.00         |
| 788.5               | C42H75O10P | PG(36:4)            | 0.01         | 0.00         |
| 790.5               | C42H77O10P | PG(36:3)            | 0.03         | 0.02         |
| 792.5               | C42H79O10P | PG(36:2)            | 0.04         | 0.00         |
| 794.6               | C42H81O10P | PG(36:1)            | 0.02         | 0.03         |
| <b>Total PG</b>     |            | <b>Total PG</b>     | <b>0.56</b>  | <b>0.32</b>  |
| 500.3               | C22H43O9P  | LPG(16:1)           | 0.72         | 3.72         |
| 502.3               | C22H45O9P  | LPG(16:0)           | 0.72         | 0.00         |
| 524.3               | C24H43O9P  | LPG(18:3)           | 0.68         | 3.16         |
| 526.3               | C24H45O9P  | LPG(18:2)           | 1.06         | 1.92         |
| 528.3               | C24H47O9P  | LPG(18:1)           | 0.40         | 3.59         |
| <b>Total LysoPG</b> |            | <b>Total LysoPG</b> | <b>3.58</b>  | <b>12.39</b> |
| 494.3               | C24H48O7PN | LPC(16:1)           | 0.00         | 0.00         |
| 496.3               | C24H50O7PN | LPC(16:0)           | 0.00         | 0.53         |
| 518.3               | C26H48O7PN | LPC(18:3)           | 0.00         | 0.00         |
| 520.3               | C26H50O7PN | LPC(18:2)           | 0.01         | 0.00         |
| 522.3               | C26H52O7PN | LPC(18:1)           | 0.01         | 0.53         |

|                     |            |                     |             |             |
|---------------------|------------|---------------------|-------------|-------------|
| 524.4               | C26H54O7PN | LPC(18:0)           | 0.00        | 0.00        |
| <b>Total LysoPC</b> |            | <b>Total LysoPC</b> | <b>0.02</b> | <b>1.11</b> |
| 452.3               | C21H42O7PN | LPE(16:1)           | 0.03        | 0.00        |
| 454.3               | C21H44O7PN | LPE(16:0)           | 0.01        | 0.00        |
| 476.3               | C23H42O7PN | LPE(18:3)           | 0.00        | 0.00        |
| 478.3               | C23H44O7PN | LPE(18:2)           | 0.02        | 0.00        |
| 480.3               | C23H46O7PN | LPE(18:1)           | 0.01        | 0.00        |
| <b>Total LysoPE</b> |            | <b>Total LysoPE</b> | <b>0.07</b> | <b>0.00</b> |
| 734.6               | C40H80O8PN | PC(32:0)            | 0.00        | 0.01        |
| 754.5               | C42H76O8PN | PC(34:4)            | 0.00        | 0.00        |
| 756.5               | C42H78O8PN | PC(34:3)            | 0.01        | 0.00        |
| 758.6               | C42H80O8PN | PC(34:2)            | 0.03        | 0.00        |
| 760.6               | C42H82O8PN | PC(34:1)            | 0.00        | 0.00        |
| 778.5               | C44H76O8PN | PC(36:6)            | 0.00        | 0.00        |
| 780.5               | C44H78O8PN | PC(36:5)            | 0.00        | 0.00        |
| 782.6               | C44H80O8PN | PC(36:4)            | 0.00        | 0.00        |
| 784.6               | C44H82O8PN | PC(36:3)            | 0.01        | 0.00        |
| 786.6               | C44H84O8PN | PC(36:2)            | 0.01        | 0.00        |
| 788.6               | C44H86O8PN | PC(36:1)            | 0.00        | 0.00        |
| 806.6               | C46H80O8PN | PC(38:6)            | 0.00        | 0.00        |
| 808.6               | C46H82O8PN | PC(38:5)            | 0.00        | 0.00        |
| 810.6               | C46H84O8PN | PC(38:4)            | 0.00        | 0.00        |
| 812.6               | C46H86O8PN | PC(38:3)            | 0.00        | 0.02        |
| 814.6               | C46H88O8PN | PC(38:2)            | 0.00        | 0.00        |
| 836.6               | C48H86O8PN | PC(40:5)            | 0.00        | 0.00        |
| 838.6               | C48H88O8PN | PC(40:4)            | 0.00        | 0.00        |
| 840.6               | C48H90O8PN | PC(40:3)            | 0.00        | 0.00        |
| 842.7               | C48H92O8PN | PC(40:2)            | 0.00        | 0.00        |
| <b>Total PC</b>     |            | <b>Total PC</b>     | <b>0.06</b> | <b>0.03</b> |
| 686.5               | C37H68O8PN | PE(32:3)            | 0.00        | 0.00        |
| 688.5               | C37H70O8PN | PE(32:2)            | 0.03        | 0.00        |
| 690.5               | C37H72O8PN | PE(32:1)            | 0.07        | 0.15        |
| 692.5               | C37H74O8PN | PE(32:0)            | 0.01        | 0.00        |
| 712.5               | C39H70O8PN | PE(34:4)            | 0.00        | 0.00        |
| 714.5               | C39H72O8PN | PE(34:3)            | 0.02        | 0.00        |
| 716.5               | C39H74O8PN | PE(34:2)            | 0.16        | 0.00        |
| 718.5               | C39H76O8PN | PE(34:1)            | 0.01        | 0.00        |
| 736.5               | C41H70O8PN | PE(36:6)            | 0.00        | 0.00        |
| 738.5               | C41H72O8PN | PE(36:5)            | 0.01        | 0.00        |
| 740.5               | C41H74O8PN | PE(36:4)            | 0.00        | 0.00        |

|                 |             |                 |             |             |
|-----------------|-------------|-----------------|-------------|-------------|
| 742.5           | C41H76O8PN  | PE(36:3)        | 0.01        | 0.01        |
| 744.5           | C41H78O8PN  | PE(36:2)        | 0.01        | 0.00        |
| 746.6           | C41H80O8PN  | PE(36:1)        | 0.00        | 0.00        |
| 764.5           | C43H74O8PN  | PE(38:6)        | 0.00        | 0.00        |
| 766.5           | C43H76O8PN  | PE(38:5)        | 0.00        | 0.00        |
| 768.5           | C43H78O8PN  | PE(38:4)        | 0.00        | 0.00        |
| 770.6           | C43H80O8PN  | PE(38:3)        | 0.00        | 0.00        |
| 798.6           | C45H84O8PN  | PE(40:3)        | 0.00        | 0.00        |
| 800.6           | C45H86O8PN  | PE(40:2)        | 0.00        | 0.00        |
| 824.6           | C47H86O8PN  | PE(42:4)        | 0.00        | 0.00        |
| 826.6           | C47H88O8PN  | PE(42:3)        | 0.00        | 0.00        |
| 828.6           | C47H90O8PN  | PE(42:2)        | 0.00        | 0.00        |
| <b>Total PE</b> |             | <b>Total PE</b> | <b>0.33</b> | <b>0.16</b> |
| 822.5           | C41H73O13P  | PI(32:3)        | 0.11        | 0.13        |
| 824.5           | C41H75O13P  | PI(32:2)        | 0.08        | 0.00        |
| 826.5           | C41H77O13P  | PI(32:1)        | 0.08        | 0.21        |
| 828.5           | C41H79O13P  | PI(32:0)        | 0.12        | 0.00        |
| 848.5           | C43H75O13P  | PI(34:4)        | 0.03        | 0.00        |
| 850.5           | C43H77O13P  | PI(34:3)        | 0.20        | 0.33        |
| 852.5           | C43H79O13P  | PI(34:2)        | 0.80        | 1.67        |
| 854.5           | C43H81O13P  | PI(34:1)        | 0.21        | 0.87        |
| 872.5           | C45H75O13P  | PI(36:6)        | 0.06        | 0.05        |
| 874.5           | C45H77O13P  | PI(36:5)        | 0.19        | 0.00        |
| 876.5           | C45H79O13P  | PI(36:4)        | 0.73        | 0.19        |
| 878.5           | C45H81O13P  | PI(36:3)        | 0.24        | 0.15        |
| 880.6           | C45H83O13P  | PI(36:2)        | 0.02        | 0.01        |
| 882.6           | C45H85O13P  | PI(36:1)        | 0.00        | 0.00        |
| <b>Total PI</b> |             | <b>Total PI</b> | <b>2.87</b> | <b>3.62</b> |
| 756.5           | C40H70O10PN | PS(34:4)        | 0.00        | 0.00        |
| 758.5           | C40H72O10PN | PS(34:3)        | 0.00        | 0.00        |
| 760.5           | C40H74O10PN | PS(34:2)        | 0.02        | 0.00        |
| 762.5           | C40H76O10PN | PS(34:1)        | 0.00        | 0.00        |
| 780.5           | C42H70O10PN | PS(36:6)        | 0.00        | 0.00        |
| 782.5           | C42H72O10PN | PS(36:5)        | 0.01        | 0.00        |
| 784.5           | C42H74O10PN | PS(36:4)        | 0.01        | 0.01        |
| 786.5           | C42H76O10PN | PS(36:3)        | 0.00        | 0.00        |
| 788.5           | C42H78O10PN | PS(36:2)        | 0.00        | 0.00        |
| 790.6           | C42H80O10PN | PS(36:1)        | 0.00        | 0.01        |
| 808.5           | C44H74O10PN | PS(38:6)        | 0.00        | 0.00        |
| 810.5           | C44H76O10PN | PS(38:5)        | 0.00        | 0.00        |

|                 |             |                 |              |              |
|-----------------|-------------|-----------------|--------------|--------------|
| 812.5           | C44H78O10PN | PS(38:4)        | 0.00         | 0.00         |
| 814.6           | C44H80O10PN | PS(38:3)        | 0.00         | 0.00         |
| 816.6           | C44H82O10PN | PS(38:2)        | 0.00         | 0.01         |
| 818.6           | C44H84O10PN | PS(38:1)        | 0.00         | 0.00         |
| 840.6           | C46H82O10PN | PS(40:4)        | 0.00         | 0.00         |
| 842.6           | C46H84O10PN | PS(40:3)        | 0.00         | 0.00         |
| 844.6           | C46H86O10PN | PS(40:2)        | 0.00         | 0.00         |
| 846.6           | C46H88O10PN | PS(40:1)        | 0.00         | 0.00         |
| 868.6           | C48H86O10PN | PS(42:4)        | 0.00         | 0.00         |
| 870.6           | C48H88O10PN | PS(42:3)        | 0.00         | 0.00         |
| 872.6           | C48H90O10PN | PS(42:2)        | 0.04         | 0.00         |
| 874.6           | C48H92O10PN | PS(42:1)        | 0.01         | 0.00         |
| 898.6           | C50H92O10PN | PS(44:3)        | 0.00         | 0.00         |
| 900.7           | C50H94O10PN | PS(44:2)        | 0.01         | 0.00         |
| <b>Total PS</b> |             | <b>Total PS</b> | <b>0.12</b>  | <b>0.04</b>  |
| 666.5           | C35H69O8P   | PA(32:0)        | 0.53         | 1.60         |
| 682.4           | C37H61O8P   | PA(34:6)        | 0.00         | 0.00         |
| 684.4           | C37H63O8P   | PA(34:5)        | 0.00         | 0.00         |
| 686.4           | C37H65O8P   | PA(34:4)        | 0.03         | 0.00         |
| 688.5           | C37H67O8P   | PA(34:3)        | 1.10         | 2.12         |
| 690.5           | C37H69O8P   | PA(34:2)        | 16.31        | 32.32        |
| 692.5           | C37H71O8P   | PA(34:1)        | 3.41         | 8.02         |
| 710.4           | C39H65O8P   | PA(36:6)        | 0.02         | 0.00         |
| 712.5           | C39H67O8P   | PA(36:5)        | 0.94         | 1.83         |
| 714.5           | C39H69O8P   | PA(36:4)        | 9.40         | 16.79        |
| 716.5           | C39H71O8P   | PA(36:3)        | 5.02         | 8.61         |
| 718.5           | C39H73O8P   | PA(36:2)        | 1.71         | 3.66         |
| <b>Total PA</b> |             | <b>Total PA</b> | <b>38.47</b> | <b>74.94</b> |

**Table S4:** Log2 values for the expression of genes in the Affymetrix array of small intestinal tissues of HFD-fed mice treated with PBS or GDNP.

|       | PBS1     | PBS2     | PBS3     | GDNP1    | GDNP2    | GDNP3    |
|-------|----------|----------|----------|----------|----------|----------|
| Foxa2 | 0.245093 | 0.269274 | 0.274455 | 0.281342 | 0.280604 | 0.277839 |
| Vamp7 | 0.551879 | 0.568156 | 0.572387 | 0.674514 | 0.642258 | 0.595921 |
| AhR   | 0.410544 | 0.402235 | 0.437675 | 0.386698 | 0.356065 | 0.339581 |
| AhRR  | 0.292204 | 0.318994 | 0.307434 | 0.351972 | 0.284516 | 0.287762 |
| ME1   | 0.595625 | 0.427374 | 0.430967 | 0.411418 | 0.389044 | 0.347299 |
| AKT1  | 0.659002 | 0.611732 | 0.569033 | 0.652737 | 0.643376 | 0.564498 |
| AKT2  | 0.421761 | 0.417318 | 0.424259 | 0.420247 | 0.409167 | 0.404079 |

|         |          |          |          |          |          |          |
|---------|----------|----------|----------|----------|----------|----------|
| Akt1Sub | 0.596186 | 0.575419 | 0.59251  | 0.562684 | 0.538849 | 0.517089 |
| ARNTL   | 0.549635 | 0.577095 | 0.622694 | 0.530312 | 0.502515 | 0.496692 |
| Cyp7a1  | 0.249019 | 0.265363 | 0.256568 | 0.247793 | 0.231414 | 0.235943 |
| Cyp8b1  | 0.226584 | 0.257542 | 0.223589 | 0.247204 | 0.227501 | 0.23043  |
| NR1H4   | 0.63152  | 0.707821 | 0.699273 | 0.781636 | 0.717719 | 0.70011  |
| Rptor   | 0.319686 | 0.353631 | 0.350475 | 0.388464 | 0.374511 | 0.379824 |
| Deptor  | 0.46046  | 0.575978 | 0.593069 | 0.532666 | 0.5109   | 0.573319 |
| mTor    | 0.430174 | 0.47933  | 0.427613 | 0.393172 | 0.481274 | 0.46527  |
| FGF15   | 0.771172 | 0.66257  | 0.680268 | 0.843437 | 0.805478 | 0.76957  |

**Table S5:** Plasma cytokines or growth factors expressed by HFD-fed mice treatment with PBS or GDNP.

| Name of cytokine/factor | Fold change GDNP vs PBS | Name of cytokine/factor | Fold change GDNP vs PBS |
|-------------------------|-------------------------|-------------------------|-------------------------|
| EGF                     | 13.31                   | WISP-1                  | -2.63                   |
| ANGPT-1                 | 6.82                    | IL-6                    | -2.22                   |
| CCL5                    | 2.42                    | IL-33                   | -2.01                   |
| Leptin                  | 2.00                    | TSG-14                  | -1.97                   |
| FGF-21                  | 1.88                    | CXCL13                  | -1.96                   |
| CXCL10                  | 1.87                    | CXCL1                   | -1.95                   |
| PDGF-BB                 | 1.72                    | VEGF                    | -1.91                   |
| CCL11                   | 1.71                    | Serpin E1               | -1.86                   |
| IL-1 $\alpha$           | 1.69                    | CD14                    | -1.81                   |
| HGF                     | 1.68                    | IL-27p28                | -1.73                   |
| IL-3                    | 1.62                    | Pentraxin               | -1.66                   |
| CCL12                   | 1.47                    | G-CSF                   | -1.64                   |
| DKK-1                   | 1.41                    | MMP-3                   | -1.62                   |
| FGF-1                   | 1.38                    | MPO                     | -1.59                   |
| IL-10                   | 1.36                    | Pref-1                  | -1.58                   |
| Areg                    | 1.34                    | IL-28                   | -1.57                   |
| IL-11                   | 1.32                    | C1q R1                  | -1.55                   |
| CCL17                   | 1.24                    | CCL2                    | -1.49                   |
|                         |                         | POSTN                   | -1.49                   |
|                         |                         | CX3CL1                  | -1.49                   |
|                         |                         | CXCL16                  | -1.48                   |
|                         |                         | IL-15                   | -1.45                   |
|                         |                         | IGFBP-1                 | -1.44                   |



|  |               |       |
|--|---------------|-------|
|  | IL-7          | -1.44 |
|  | RAGE          | -1.40 |
|  | IFN- $\gamma$ | -1.39 |
|  | TIM-1         | -1.39 |
|  | Proliferin    | -1.34 |
|  | END           | -1.33 |
|  | LCN-2         | -1.33 |
|  | ANGPT-2       | -1.28 |
|  | LIF           | -1.28 |
|  | BAFF          | -1.25 |
|  | TNF- $\alpha$ | -1.25 |
